# Supplementary material for: Redefining Cardiac Involvement and Targets of Treatment in Systemic Immunoglobulin AL Amyloidosis
Source: PubMed Central journal article supplement (PMC11339700; doi:10.1001/jamacardio.2024.2555), 2024-08-21
Supplement: jamacardiol-e242555-s002.pdf [file jamacardiol-e242555-s002.pdf]

## Data Sharing Statement

Porcari. Redefining Cardiac Involvement and Targets of Treatment in Systemic Immunoglobulin AL Amyloidosis. *JAMA Cardiol.* Published August 21, 2024.  
doi:10.1001/jamacardio.2024.2555

### Data

**Data available:** No

### Additional Information

**Explanation for why data not available:** The data underlying this article cannot be shared publicly because of the privacy of individuals who participated in the study. The data will be shared on reasonable request to the corresponding author.
